# Supplementary material for: Revealing the photo-degradation mechanism of PM6:Y6 based high-efficiency organic solar cells
Source: Royal Society of Chemistry journal article supplement (doi:10.1039/d1tc03655f), 2021-01-01
Supplement: d1tc03655f1.pdf [file d1tc03655f1.pdf]

## *Supporting Information*

### **Revealing photo-degradation mechanism of PM6:Y6 based high-efficiency organic solar cells**

*Yunsen Zhao, Zinan Wu, Xin Liu, Ziping Zhong, Rihong Zhu and Jiangsheng Yu\**

*MIIT Key Laboratory of Advanced Solid Laser, School of Electronic and Optical Engineering, Nanjing*

*University of Science and Technology, Nanjing 210094, PR China*

*\*Corresponding author.*

*E-mail: yjs@njust.edu.cn (J. Yu).*

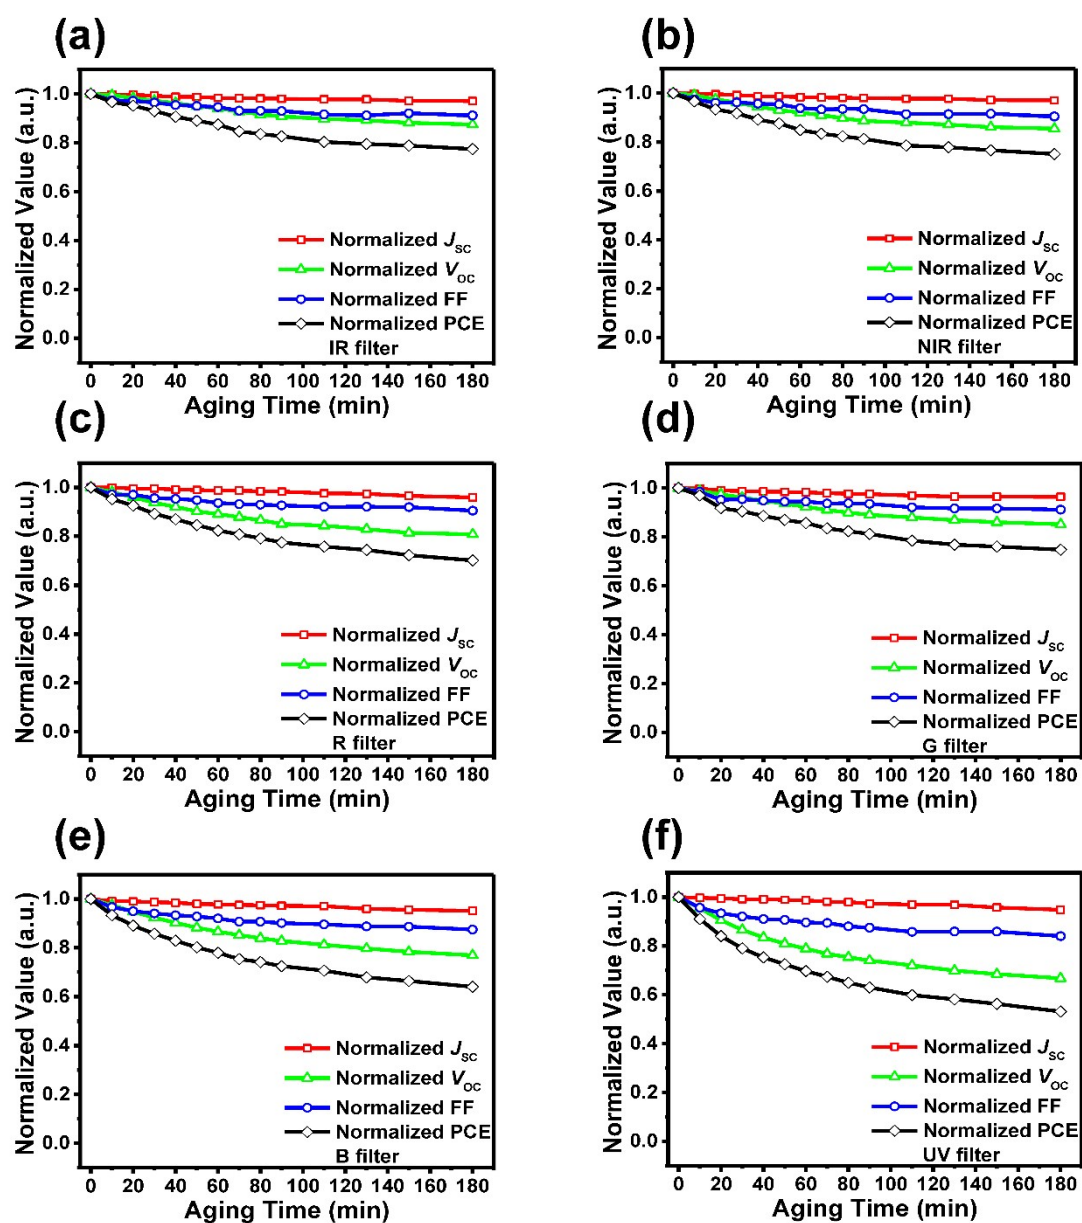

**Fig. S1.** Normalized photovoltaic parameters of aged devices under simulated 1-sun illumination with different filters.

**Table S1** Photovoltaic parameters of aged device under illumination with IR filter.

| Aging Time<br>(min) | $J_{SC}$ (mA cm <sup>-2</sup> ) | $V_{OC}$ (V)      | FF (%)           | PCE (%)          |
|---------------------|---------------------------------|-------------------|------------------|------------------|
| 0                   | 25.3<br>(100.0%)                | 0.827<br>(100.0%) | 71.1<br>(100.0%) | 14.9<br>(100.0%) |
| 10                  | 25.2<br>(99.8%)                 | 0.823<br>(99.5%)  | 69.2<br>(97.4%)  | 14.4<br>(96.7%)  |
| 20                  | 25.2<br>(99.6%)                 | 0.813<br>(98.3%)  | 69.1<br>(97.2%)  | 14.2<br>(95.2%)  |
| 30                  | 25.1<br>(99.2%)                 | 0.804<br>(97.2%)  | 68.6<br>(96.5%)  | 13.8<br>(93.0%)  |
| 40                  | 25.0<br>(98.8%)                 | 0.796<br>(96.3%)  | 67.9<br>(95.4%)  | 13.5<br>(90.7%)  |
| 50                  | 25.0<br>(98.7%)                 | 0.786<br>(95.0%)  | 67.6<br>(95.0%)  | 13.3<br>(89.1%)  |
| 60                  | 24.9<br>(98.3%)                 | 0.778<br>(94.1%)  | 67.3<br>(94.6%)  | 13.0<br>(87.5%)  |
| 70                  | 24.8<br>(98.2%)                 | 0.767<br>(92.7%)  | 66.2<br>(93.1%)  | 12.6<br>(84.8%)  |
| 80                  | 24.8<br>(98.1%)                 | 0.758<br>(91.6%)  | 66.2<br>(93.1%)  | 12.4<br>(83.7%)  |
| 90                  | 24.8<br>(98.0%)                 | 0.751<br>(90.8%)  | 66.1<br>(93.0%)  | 12.3<br>(82.8%)  |
| 110                 | 24.7<br>(97.7%)                 | 0.743<br>(89.9%)  | 65.1<br>(91.6%)  | 12.0<br>(80.4%)  |
| 130                 | 24.7<br>(97.7%)                 | 0.738<br>(89.3%)  | 64.9<br>(91.2%)  | 11.8<br>(79.6%)  |
| 150                 | 24.6<br>(97.1%)                 | 0.730<br>(88.2%)  | 65.5<br>(92.1%)  | 11.7<br>(78.9%)  |
| 180                 | 24.5<br>(97.1%)                 | 0.724<br>(87.6%)  | 64.9<br>(91.2%)  | 11.5<br>(77.5%)  |

The percentage values in brackets are the remaining values relative to the fresh device.

**Table S2** Photovoltaic parameters of aged device under illumination with NIR filter.

| Aging Time<br>(min) | $J_{SC}$ (mA cm <sup>-2</sup> ) | $V_{OC}$ (V)      | FF (%)           | PCE (%)          |
|---------------------|---------------------------------|-------------------|------------------|------------------|
| 0                   | 25.1<br>(100.0%)                | 0.836<br>(100.0%) | 72.3<br>(100.0%) | 15.2<br>(100.0%) |
| 10                  | 25.0<br>(99.7%)                 | 0.830<br>(99.2%)  | 70.5<br>(97.5%)  | 14.6<br>(96.6%)  |
| 20                  | 25.0<br>(99.6%)                 | 0.815<br>(97.5%)  | 69.5<br>(96.1%)  | 14.1<br>(93.4%)  |
| 30                  | 24.8<br>(99.3%)                 | 0.804<br>(96.1%)  | 69.6<br>(96.2%)  | 13.9<br>(91.8%)  |
| 40                  | 24.5<br>(98.5%)                 | 0.790<br>(94.5%)  | 69.2<br>(95.7%)  | 13.4<br>(89.3%)  |
| 50                  | 24.4<br>(98.3%)                 | 0.778<br>(93.1%)  | 69.0<br>(95.4%)  | 13.1<br>(87.7%)  |
| 60                  | 24.3<br>(98.3%)                 | 0.769<br>(92.0%)  | 67.9<br>(93.9%)  | 12.7<br>(85.0%)  |
| 70                  | 24.3<br>(98.2%)                 | 0.761<br>(91.1%)  | 67.5<br>(93.3%)  | 12.5<br>(83.5%)  |
| 80                  | 24.2<br>(98.1%)                 | 0.751<br>(89.8%)  | 67.6<br>(93.6%)  | 12.3<br>(82.4%)  |
| 90                  | 24.1<br>(97.9%)                 | 0.742<br>(88.7%)  | 67.6<br>(93.5%)  | 12.1<br>(81.4%)  |
| 110                 | 24.0<br>(97.6%)                 | 0.736<br>(88.0%)  | 66.1<br>(91.4%)  | 11.7<br>(78.7%)  |
| 130                 | 23.9<br>(97.3%)                 | 0.729<br>(87.2%)  | 66.1<br>(91.5%)  | 11.5<br>(78.0%)  |
| 150                 | 23.7<br>(97.1%)                 | 0.721<br>(86.2%)  | 66.2<br>(91.6%)  | 11.3<br>(76.7%)  |
| 180                 | 23.6<br>(96.9%)                 | 0.715<br>(85.6%)  | 65.4<br>(90.5%)  | 11.1<br>(75.2%)  |

The percentage values in brackets are the remaining values relative to the fresh device.

**Table S3** Photovoltaic parameters of aged device under illumination with R filter.

| Aging Time<br>(min) | $J_{SC}$ (mA cm <sup>-2</sup> ) | $V_{OC}$ (V)      | FF (%)           | PCE (%)          |
|---------------------|---------------------------------|-------------------|------------------|------------------|
| 0                   | 25.2<br>(100.0%)                | 0.825<br>(100.0%) | 71.7<br>(100.0%) | 14.9<br>(100.0%) |
| 10                  | 25.2<br>(99.9%)                 | 0.810<br>(98.1%)  | 69.7<br>(97.1%)  | 14.2<br>(95.2%)  |
| 20                  | 25.1<br>(99.5%)                 | 0.791<br>(95.9%)  | 69.6<br>(97.0%)  | 13.8<br>(92.6%)  |
| 30                  | 25.1<br>(99.5%)                 | 0.774<br>(93.8%)  | 68.6<br>(95.6%)  | 13.3<br>(89.2%)  |
| 40                  | 25.0<br>(99.1%)                 | 0.759<br>(92.0%)  | 68.4<br>(95.3%)  | 13.0<br>(87.0%)  |
| 50                  | 24.9<br>(98.9%)                 | 0.744<br>(90.2%)  | 68.0<br>(94.8%)  | 12.6<br>(84.6%)  |
| 60                  | 24.9<br>(98.7%)                 | 0.735<br>(89.1%)  | 67.2<br>(93.7%)  | 12.3<br>(82.3%)  |
| 70                  | 24.9<br>(98.7%)                 | 0.725<br>(87.9%)  | 66.8<br>(93.2%)  | 12.0<br>(80.8%)  |
| 80                  | 24.8<br>(98.4%)                 | 0.714<br>(86.6%)  | 66.7<br>(92.9%)  | 11.8<br>(79.2%)  |
| 90                  | 24.8<br>(98.3%)                 | 0.702<br>(85.1%)  | 66.5<br>(92.6%)  | 11.6<br>(77.5%)  |
| 110                 | 24.6<br>(97.6%)                 | 0.696<br>(84.3%)  | 66.0<br>(92.0%)  | 11.3<br>(75.8%)  |
| 130                 | 24.5<br>(97.4%)                 | 0.684<br>(82.9%)  | 66.1<br>(92.1%)  | 11.1<br>(74.4%)  |
| 150                 | 24.3<br>(96.5%)                 | 0.672<br>(81.4%)  | 66.0<br>(91.9%)  | 10.8<br>(72.3%)  |
| 180                 | 24.7<br>(95.9%)                 | 0.666<br>(80.8%)  | 64.9<br>(90.5%)  | 10.5<br>(70.1%)  |

The percentage values in brackets are the remaining values relative to the fresh device.

**Table S4** Photovoltaic parameters of aged device under illumination with G filter.

| Aging Time<br>(min) | $J_{SC}$ (mA cm <sup>-2</sup> ) | $V_{OC}$ (V)      | FF (%)           | PCE (%)          |
|---------------------|---------------------------------|-------------------|------------------|------------------|
| 0                   | 25.2<br>(100.0%)                | 0.831<br>(100.0%) | 71.7<br>(100.0%) | 15.0<br>(100.0%) |
| 10                  | 25.1<br>(99.8%)                 | 0.821<br>(98.8%)  | 70.5<br>(98.4%)  | 14.5<br>(97.0%)  |
| 20                  | 24.9<br>(99.0%)                 | 0.810<br>(97.4%)  | 68.2<br>(95.2%)  | 13.8<br>(91.8%)  |
| 30                  | 24.8<br>(98.7%)                 | 0.798<br>(96.1%)  | 68.4<br>(95.4%)  | 13.6<br>(90.5%)  |
| 40                  | 24.8<br>(98.6%)                 | 0.788<br>(94.8%)  | 68.0<br>(94.8%)  | 13.3<br>(88.6%)  |
| 50                  | 24.8<br>(98.4%)                 | 0.778<br>(93.6%)  | 67.7<br>(94.4%)  | 13.0<br>(86.9%)  |
| 60                  | 24.7<br>(98.2%)                 | 0.767<br>(92.3%)  | 67.7<br>(94.5%)  | 12.8<br>(85.6%)  |
| 70                  | 24.6<br>(97.9%)                 | 0.756<br>(91.0%)  | 67.2<br>(93.7%)  | 12.5<br>(83.4%)  |
| 80                  | 24.6<br>(97.6%)                 | 0.747<br>(89.9%)  | 67.2<br>(93.7%)  | 12.3<br>(82.3%)  |
| 90                  | 24.5<br>(97.5%)                 | 0.740<br>(89.0%)  | 67.0<br>(93.5%)  | 12.2<br>(81.2%)  |
| 110                 | 24.4<br>(96.9%)                 | 0.731<br>(87.9%)  | 66.0<br>(92.1%)  | 11.8<br>(78.4%)  |
| 130                 | 24.3<br>(96.5%)                 | 0.722<br>(86.8%)  | 65.7<br>(91.6%)  | 11.5<br>(76.8%)  |
| 150                 | 24.3<br>(96.5%)                 | 0.714<br>(86.0%)  | 65.7<br>(91.6%)  | 11.4<br>(76.0%)  |
| 180                 | 24.2<br>(96.3%)                 | 0.707<br>(85.1%)  | 65.3<br>(91.1%)  | 11.2<br>(74.7%)  |

The percentage values in brackets are the remaining values relative to the fresh device.

**Table S5** Photovoltaic parameters of aged device under illumination with B filter.

| Aging Time<br>(min) | $J_{SC}$ (mA cm <sup>-2</sup> ) | $V_{OC}$ (V)      | FF (%)           | PCE (%)          |
|---------------------|---------------------------------|-------------------|------------------|------------------|
| 0                   | 25.2<br>(100.0%)                | 0.846<br>(100.0%) | 71.2<br>(100.0%) | 15.2<br>(100.0%) |
| 10                  | 24.9<br>(99.1%)                 | 0.825<br>(97.5%)  | 68.8<br>(96.7%)  | 14.2<br>(93.4%)  |
| 20                  | 24.9<br>(99.0%)                 | 0.802<br>(94.8%)  | 67.6<br>(95.0%)  | 13.5<br>(89.1%)  |
| 30                  | 24.8<br>(98.7%)                 | 0.781<br>(92.3%)  | 67.0<br>(94.0%)  | 13.0<br>(85.7%)  |
| 40                  | 24.8<br>(98.5%)                 | 0.763<br>(90.2%)  | 66.4<br>(93.3%)  | 12.6<br>(82.9%)  |
| 50                  | 24.7<br>(98.0%)                 | 0.746<br>(88.2%)  | 66.1<br>(92.8%)  | 12.2<br>(80.2%)  |
| 60                  | 24.6<br>(97.8%)                 | 0.733<br>(86.6%)  | 65.5<br>(92.0%)  | 11.8<br>(77.9%)  |
| 70                  | 24.5<br>(97.5%)                 | 0.721<br>(85.2%)  | 64.6<br>(90.7%)  | 11.4<br>(75.3%)  |
| 80                  | 24.5<br>(97.4%)                 | 0.710<br>(83.9%)  | 64.6<br>(90.7%)  | 11.2<br>(74.1%)  |
| 90                  | 24.4<br>(97.1%)                 | 0.700<br>(82.8%)  | 64.2<br>(90.1%)  | 11.0<br>(72.5%)  |
| 110                 | 24.4<br>(97.1%)                 | 0.687<br>(81.2%)  | 63.8<br>(89.6%)  | 10.7<br>(70.6%)  |
| 130                 | 24.1<br>(95.9%)                 | 0.674<br>(79.7%)  | 63.2<br>(88.8%)  | 10.3<br>(67.9%)  |
| 150                 | 24.0<br>(95.6%)                 | 0.663<br>(78.3%)  | 63.1<br>(88.7%)  | 10.1<br>(66.4%)  |
| 180                 | 23.9<br>(95.1%)                 | 0.651<br>(76.9%)  | 62.3<br>(87.5%)  | 9.70<br>(64.0%)  |

The percentage values in brackets are the remaining values relative to the fresh device.

**Table S6** Photovoltaic parameters of aged device under illumination with UV filter.

| Aging Time<br>(min) | $J_{SC}$ (mA cm <sup>-2</sup> ) | $V_{OC}$ (V)      | FF (%)           | PCE (%)          |
|---------------------|---------------------------------|-------------------|------------------|------------------|
| 0                   | 25.2<br>(100.0%)                | 0.829<br>(100.0%) | 71.6<br>(100.0%) | 15.0<br>(100.0%) |
| 10                  | 25.2<br>(99.7%)                 | 0.792<br>(95.5%)  | 68.5<br>(95.7%)  | 13.6<br>(91.0%)  |
| 20                  | 25.1<br>(99.5%)                 | 0.750<br>(90.5%)  | 66.8<br>(93.4%)  | 12.6<br>(84.0%)  |
| 30                  | 25.0<br>(99.1%)                 | 0.718<br>(86.6%)  | 65.9<br>(92.1%)  | 11.8<br>(79.0%)  |
| 40                  | 25.0<br>(99.1%)                 | 0.692<br>(83.5%)  | 65.2<br>(91.0%)  | 11.3<br>(75.3%)  |
| 50                  | 24.9<br>(98.9%)                 | 0.671<br>(80.9%)  | 64.9<br>(90.6%)  | 10.9<br>(72.5%)  |
| 60                  | 24.9<br>(98.7%)                 | 0.654<br>(78.8%)  | 64.1<br>(89.6%)  | 10.4<br>(69.7%)  |
| 70                  | 24.8<br>(98.1%)                 | 0.637<br>(76.8%)  | 64.0<br>(89.4%)  | 10.1<br>(67.4%)  |
| 80                  | 24.7<br>(98.0%)                 | 0.625<br>(75.3%)  | 63.0<br>(88.0%)  | 9.73<br>(65.0%)  |
| 90                  | 24.6<br>(97.4%)                 | 0.614<br>(74.0%)  | 62.6<br>(87.4%)  | 9.43<br>(63.0%)  |
| 110                 | 24.5<br>(97.0%)                 | 0.597<br>(72.0%)  | 61.4<br>(85.8%)  | 8.97<br>(59.9%)  |
| 130                 | 24.4<br>(96.8%)                 | 0.579<br>(69.9%)  | 61.5<br>(85.9%)  | 8.70<br>(58.1%)  |
| 150                 | 24.2<br>(95.7%)                 | 0.567<br>(68.4%)  | 61.5<br>(85.9%)  | 8.42<br>(56.2%)  |
| 180                 | 23.9<br>(94.8%)                 | 0.553<br>(66.7%)  | 60.1<br>(84.0%)  | 7.96<br>(53.1%)  |

The percentage values in brackets are the remaining values relative to the fresh device.



**Table S7** Photovoltaic parameters of aged device under illumination w/o filter.

| Aging Time<br>(min) | $J_{SC}$ (mA cm <sup>-2</sup> ) | $V_{OC}$ (V)      | FF (%)           | PCE (%)          |
|---------------------|---------------------------------|-------------------|------------------|------------------|
| 0                   | 24.8<br>(100.0%)                | 0.832<br>(100.0%) | 72.5<br>(100.0%) | 14.9<br>(100.0%) |
| 10                  | 24.6<br>(99.4%)                 | 0.784<br>(94.2%)  | 68.9<br>(95.0%)  | 13.3<br>(89.0%)  |
| 20                  | 24.3<br>(98.3%)                 | 0.735<br>(88.3%)  | 67.1<br>(92.5%)  | 12.0<br>(80.3%)  |
| 30                  | 24.2<br>(98.0%)                 | 0.699<br>(84.0%)  | 65.9<br>(90.9%)  | 11.2<br>(74.9%)  |
| 40                  | 24.2<br>(97.9%)                 | 0.672<br>(80.8%)  | 65.1<br>(89.8%)  | 10.6<br>(71.0%)  |
| 50                  | 24.2<br>(97.6%)                 | 0.651<br>(78.2%)  | 64.1<br>(88.4%)  | 10.1<br>(67.5%)  |
| 60                  | 24.2<br>(97.6%)                 | 0.636<br>(76.4%)  | 63.8<br>(88.1%)  | 9.81<br>(65.7%)  |
| 70                  | 23.8<br>(96.3%)                 | 0.620<br>(74.5%)  | 62.7<br>(86.5%)  | 9.27<br>(62.1%)  |
| 80                  | 23.9<br>(96.6%)                 | 0.608<br>(73.1%)  | 62.8<br>(86.6%)  | 9.12<br>(61.1%)  |
| 90                  | 23.6<br>(95.3%)                 | 0.599<br>(72.0%)  | 62.2<br>(85.8%)  | 8.79<br>(58.9%)  |
| 110                 | 23.5<br>(94.8%)                 | 0.586<br>(70.4%)  | 61.1<br>(84.2%)  | 8.40<br>(56.3%)  |
| 130                 | 23.2<br>(93.6%)                 | 0.569<br>(68.4%)  | 61.0<br>(84.2%)  | 8.04<br>(53.9%)  |
| 150                 | 22.9<br>(92.5%)                 | 0.560<br>(67.3%)  | 61.0<br>(84.1%)  | 7.82<br>(52.4%)  |
| 180                 | 22.6<br>(91.2%)                 | 0.548<br>(65.9%)  | 60.1<br>(82.9%)  | 7.44<br>(49.8%)  |

The percentage values in brackets are the remaining values relative to the fresh device.

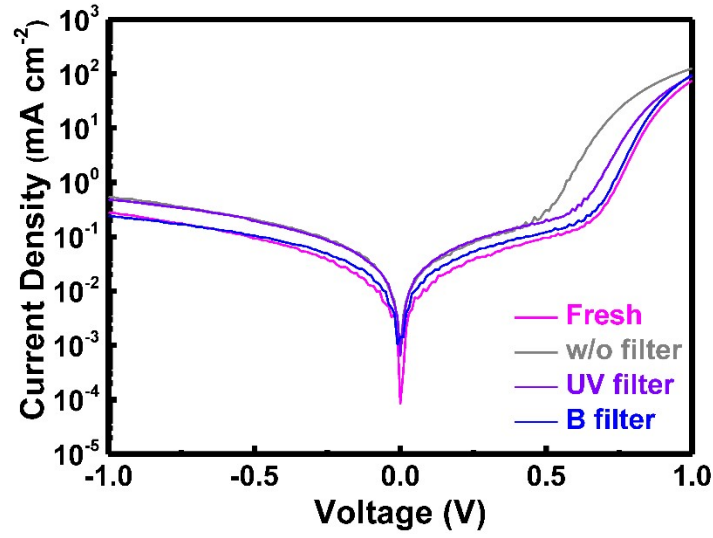

**Fig. S2.** Dark  $J$ - $V$  curves of the fresh and aged devices under 1-hour illumination.

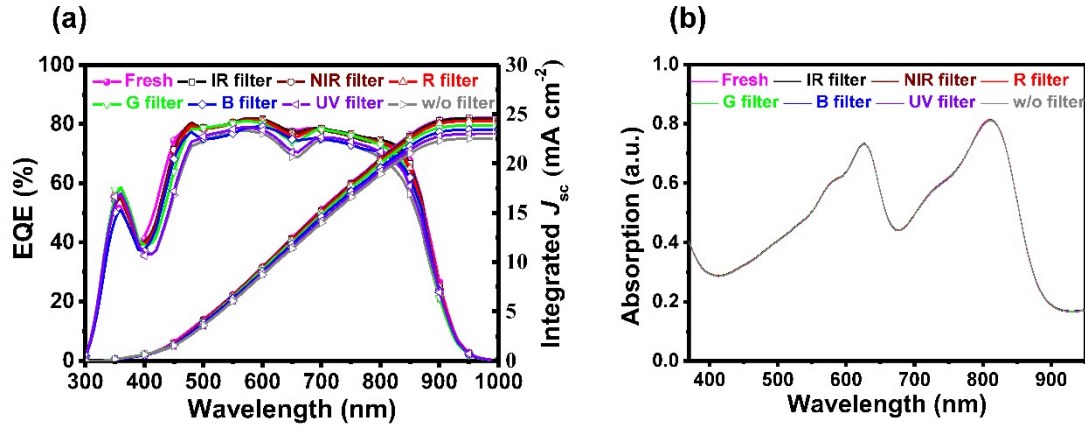

**Fig. S3.** (a) EQE curves and (b) UV absorption spectra of the fresh and aged devices under 1-hour illumination.

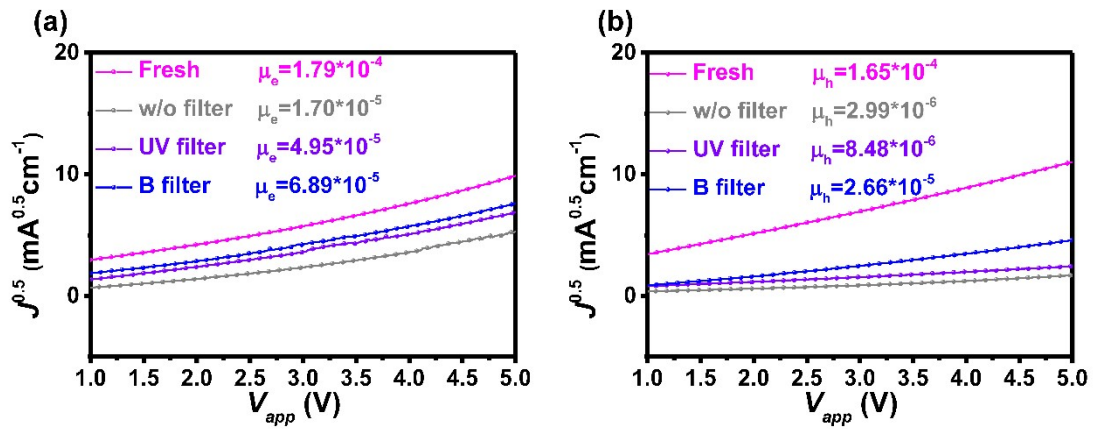

**Fig. S4.**  $J$ - $V$  characteristics of (a) electron-only and (b) hole-only of the fresh and aged devices under 1-hour illumination.

**Table S8** The  $\mu_e/\mu_h$  mobilities of blend films under 1-hour illumination.

| condition  | $\mu_e$<br>( $\text{cm}^2 \text{V}^{-1} \text{s}^{-1}$ ) | $\mu_h$<br>( $\text{cm}^2 \text{V}^{-1} \text{s}^{-1}$ ) | $\mu_e/\mu_h$ |
|------------|----------------------------------------------------------|----------------------------------------------------------|---------------|
| fresh      | $1.79 \times 10^{-5}$                                    | $1.65 \times 10^{-5}$                                    | 1.08          |
| w/o filter | $1.70 \times 10^{-6}$                                    | $2.99 \times 10^{-7}$                                    | 5.69          |
| B          | $6.89 \times 10^{-6}$                                    | $2.66 \times 10^{-6}$                                    | 2.59          |
| UV         | $4.95 \times 10^{-6}$                                    | $8.84 \times 10^{-7}$                                    | 5.60          |

**Table S9** Photovoltaic parameters of PM6:BTP-ec9 and PM6:BTP-BO-4Cl based devices.

| Acceptor       | condition        | $J_{SC}$<br>( $\text{mA cm}^{-2}$ ) | $J_{SC}^{EQE}$<br>( $\text{mA cm}^{-2}$ ) | $V_{OC}$<br>(V) | FF<br>(%) | PCE<br>(%)           |
|----------------|------------------|-------------------------------------|-------------------------------------------|-----------------|-----------|----------------------|
| BTP-ec9        | fresh            | 25.7                                | 24.4                                      | 0.849           | 78.5      | 17.1<br>(16.7±0.244) |
|                | w/o<br>filter-1h | 25.3                                | 24.1                                      | 0.779           | 72.8      | 14.3<br>(14.2±0.432) |
|                | w/o<br>filter-3h | 25.1                                | 23.8                                      | 0.724           | 69.9      | 12.7<br>(12.6±0.534) |
| BTP-BO-<br>4Cl | fresh            | 26.3                                | 25.1                                      | 0.847           | 74.7      | 16.7<br>(16.3±0.201) |
|                | w/o<br>filter-1h | 26.0                                | 24.8                                      | 0.768           | 68.6      | 13.7<br>(13.5±0.384) |
|                | w/o<br>filter-3h | 26.0                                | 24.7                                      | 0.701           | 63.9      | 11.6<br>(11.5±0.546) |
